# Supplementary material
Source: HighWire-hosted journal article supplement (https://bmjpaedsopen.bmj.com/content/3/1/e000592)
Supplement: inline-supplementary-material-2 [file inline-supplementary-material-2.pdf]

## Incidence report form

Patient label

**Delivery method**

- Vaginal delivery  
 Elective Caecarian Section  
 Acute Caecarean Section

Time of birth: \_\_\_\_\_

Gestational age: \_\_\_\_\_

### Were resuscitative interventions provided?

No

Yes

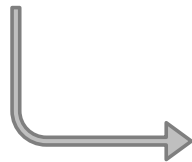

- CPAP**  
(NeoPuff mask applied on the newborn but no given ventilations)
- Positive pressure ventilation**  
(Ventilations with NeoPuff or Laerdal BagMask)
- Intubated**
- Chest compressions**
- I.v. access**

### Primary resuscitation team present at birth?

Yes

No

For study personell

Project id: \_\_\_\_\_

Immedeate deletion of the video record is requested by the personell
